# Supplementary material for: Classification of dendritic cell phenotypes from gene expression data
Source: BMC Immunol. 2011 Aug 29;12:50. doi: 10.1186/1471-2172-12-50 (PMC3179938; doi:10.1186/1471-2172-12-50)
Supplement: Additional file 1 — Detailed list of the experiments and array types. [file 1471-2172-12-50-S1.XLS]

## Sheet: Sheet1
	sample name	sample type	chip	features	total
Training/Test dataset	CpG	Inflamm	mgu74av2	12488	12
	Shist.Eggs	Inflamm	mgu74av2	12488	10
	LPS	Inflamm	mgu74av2	12488	8
	Zym	Inflamm	mgu74av2	12488	11
	Leish.prom	Inflamm	mgu74av2	12488	9
	polyIC	Inflamm	mgu74av2	12488	11
	Dex	not Inflamm	mgu74av2	12488	10
	Shist.SLA	not Inflamm	mgu74av2	12488	9
	Leish.amas	not Inflamm	mgu74av2	12488	9
	List.monocyt	Inflamm	moe430a	22690	12
	List.innoc	Inflamm	moe430a	22690	12
	Bordet.parapert	Inflamm	moe430a	22690	8
	Bordet.pert	Inflamm	moe430a	22690	12
	Lactob.para	Inflamm	moe430a2	22690	12
	Lactoc.lactis	Inflamm	moe430a3	22690	10
					155
Validation dataset	sample name	sample type	chip	features	total
	CT	not Inflamm	mgu74av2	12488	12
	LPS_2	Inflamm	moe430a2	22690	6
	EGD_A	Inflamm	mgu74av2	12488	5
	EGDe	Inflamm	mgu74av2	12488	10
	EGDp_A	Inflamm	mgu74av2	12488	4
	EGDd_A	Inflamm	mgu74av2	12488	4
	LI	Inflamm	mgu74av2	12488	8
					49
